# Supplementary material for: Ni-doped rutile TiO2nanoflowers: low-temperature solution synthesis and enhanced photocatalytic efficiency
Source: Royal Society of Chemistry journal article supplement (doi:10.1039/c6ra01752e), 2016-01-01
Supplement: c6ra01752e1.pdf [file c6ra01752e1.pdf]

## Electronic Supplementary Information for

### Ni-doped rutile TiO<sub>2</sub> nanoflowers: Low-temperature solution synthesis and the enhanced photocatalytic efficiency

Lu-Lu Lai, and Jin-Ming Wu\*

*State Key Laboratory of Silicon Materials, and School of Materials Science and Engineering, Zhejiang University, Hangzhou, 310037, P. R. China*

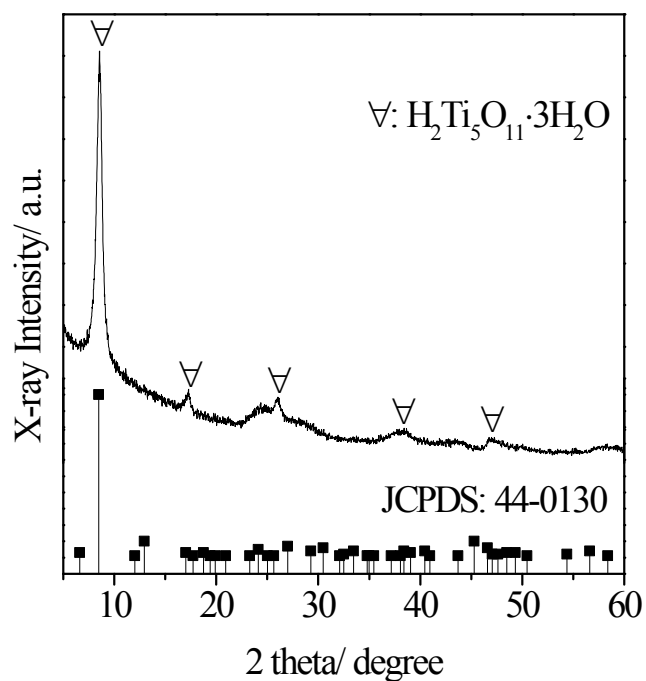

Figure S1. XRD pattern of the as-synthesized titanate nanowires

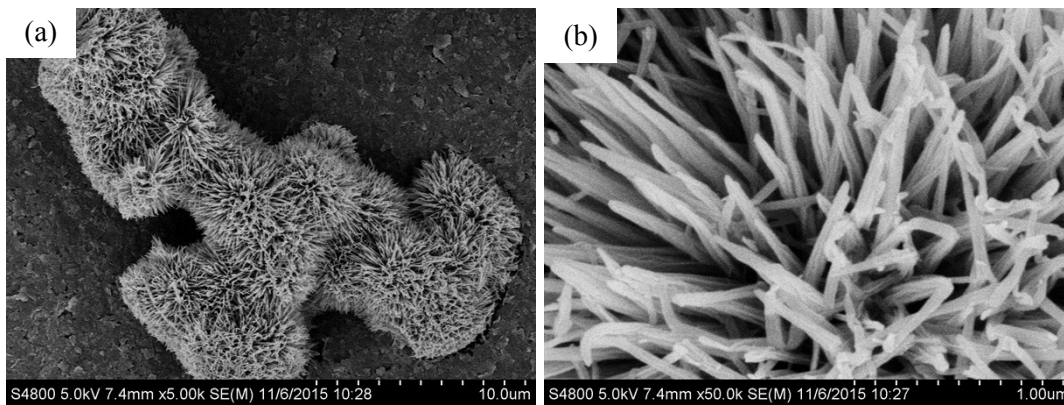

Figure S2. Low (a) and (b) high magnification FESEM images of the as-synthesized titanate nanowires.

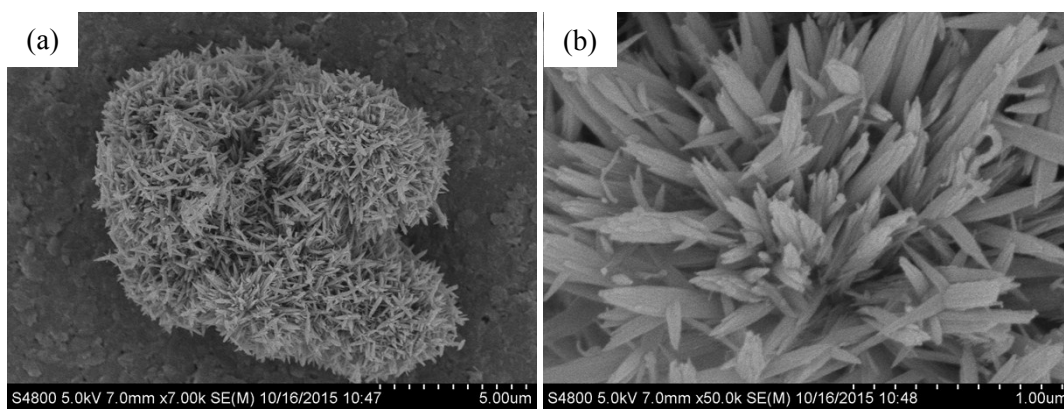

Figure S3. Low (a) and (b) high magnification FESEM images of titanate nanowires after immersing at 80 °C for 72 h in 0.05 M  $H_2SO_4$  solution.

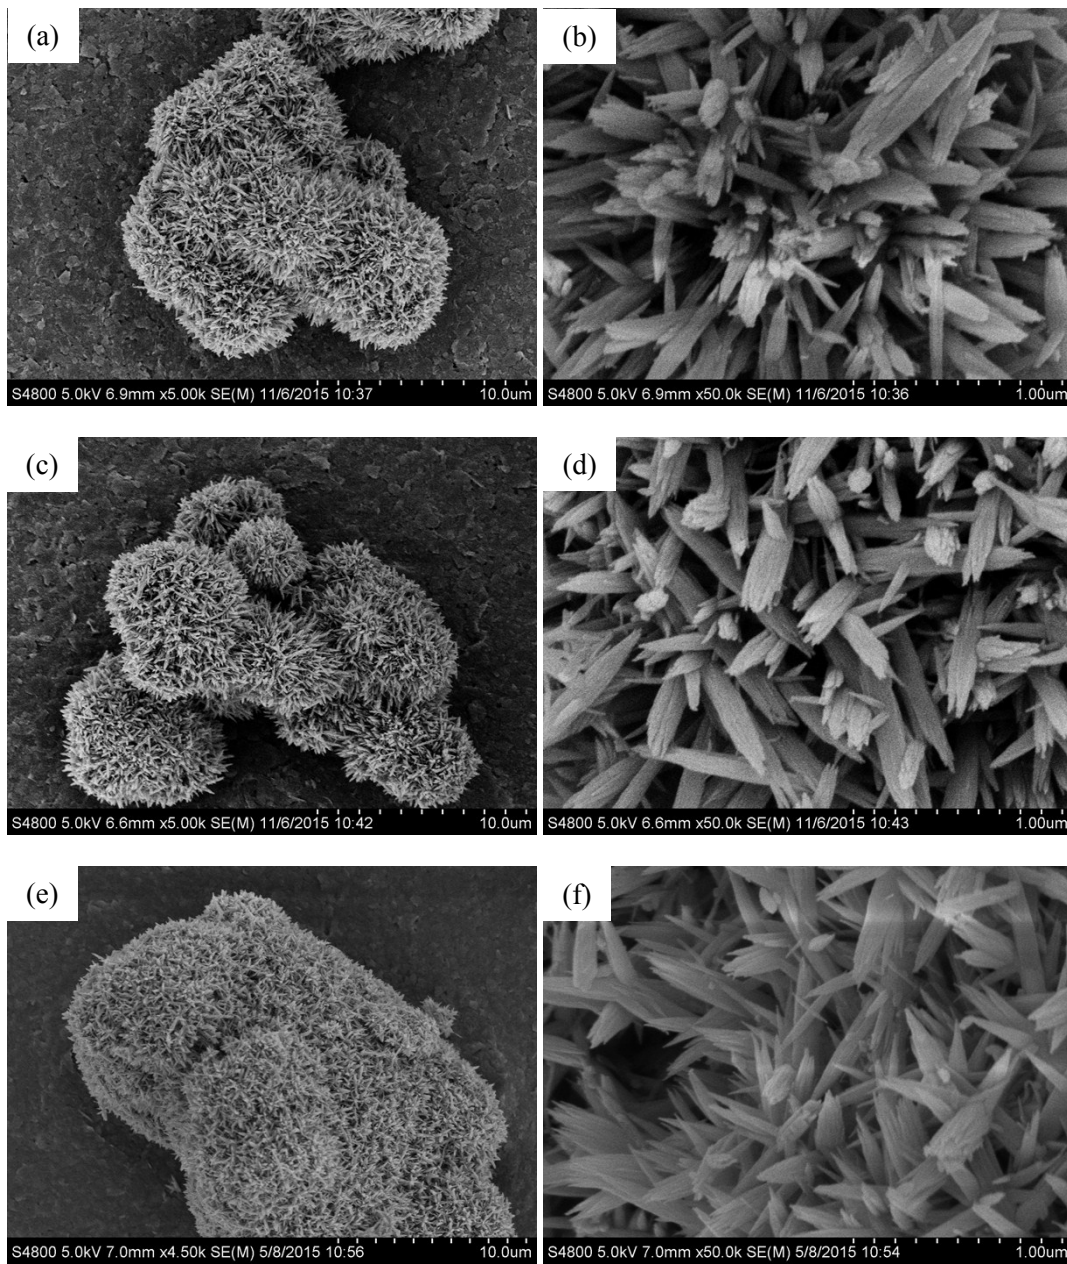

Figure S4. FESEM images of titanate nanowires after immersing at 80 °C for 72 h in 0.05 M  $\text{H}_2\text{SO}_4$  solutions containing  $\text{NiSO}_4 \cdot 6\text{H}_2\text{O}$  with various concentrations of (a, b) 0.5 mM, (c, d) 2 mM, and (e, f) 4 mM.

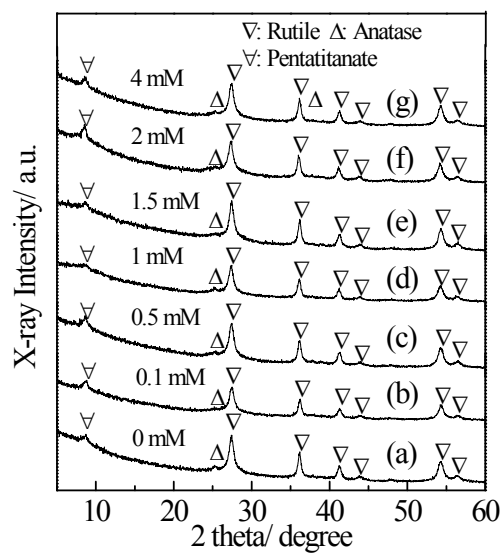

Figure S5. XRD patterns of titanate nanowires after immersing at 80 °C for 72 h in 0.05 M H<sub>2</sub>SO<sub>4</sub> solutions containing NiSO<sub>4</sub>·6H<sub>2</sub>O with various concentrations of (a) 0 mM, (b) 0.1 mM, (c) 0.5 mM, (d) 1 mM, (e) 2 mM and (f) 4 mM.

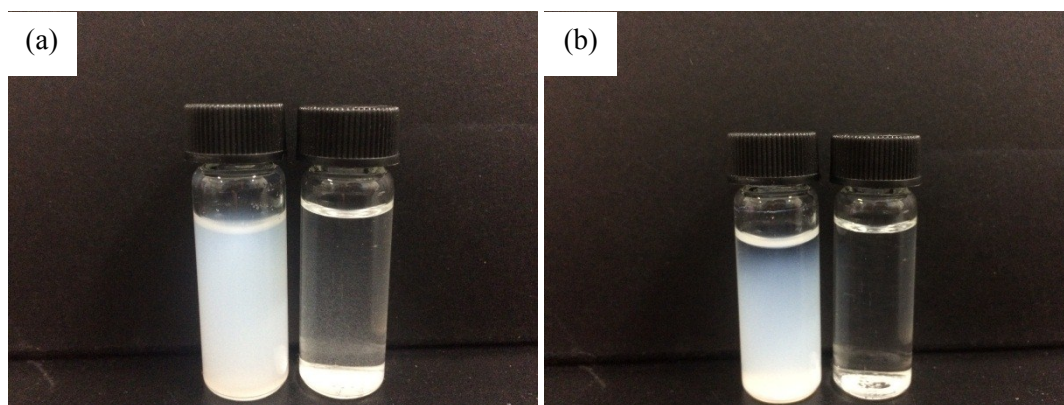

Figure S6. Optical photographs of the slurry system of P25 (left) and Ni-doped TiO<sub>2</sub> nanoflowers (right) after sediment for 1 min (a) and 24 h (b).

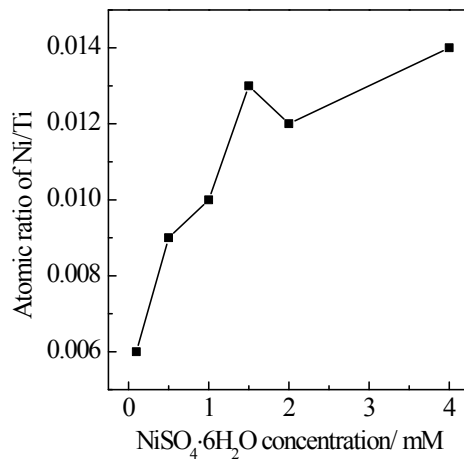

Figure S7. Ni/Ti atomic ratio derived from the SEM-EDS analysis as a function of the concentration of NiSO<sub>4</sub>·6H<sub>2</sub>O in the H<sub>2</sub>SO<sub>4</sub> solution.

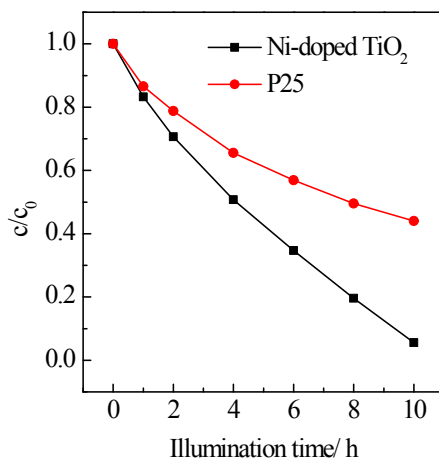

Figure S8. Photodegradation curves of rhodamine B in the presence of Ni-doped rutile nanoflowers and P25 under UV + Vis light illumination. Initial RhB concentration: 0.1 mM (50 ppm); catalyst load: 0.2 g·L<sup>-1</sup>.
